# Supplementary material for: Oxidation of testosterone by permanganate and its implication in sports drug testing
Source: Royal Society of Chemistry journal article supplement (doi:10.1039/c4nj01478b), 2014-12-02
Supplement: c4nj01478b1.pdf [file c4nj01478b1.pdf]

*New Journal of Chemistry* - Supplementary data

**Oxidation of testosterone by permanganate and its implication in sports drug testing**

Unnikrishnan Kuzhiumparambil, Shimpei Watanabe, Shanlin Fu

*Centre for Forensic Science, School of Chemistry and Forensic Science, University of Technology, Sydney (UTS), Australia*

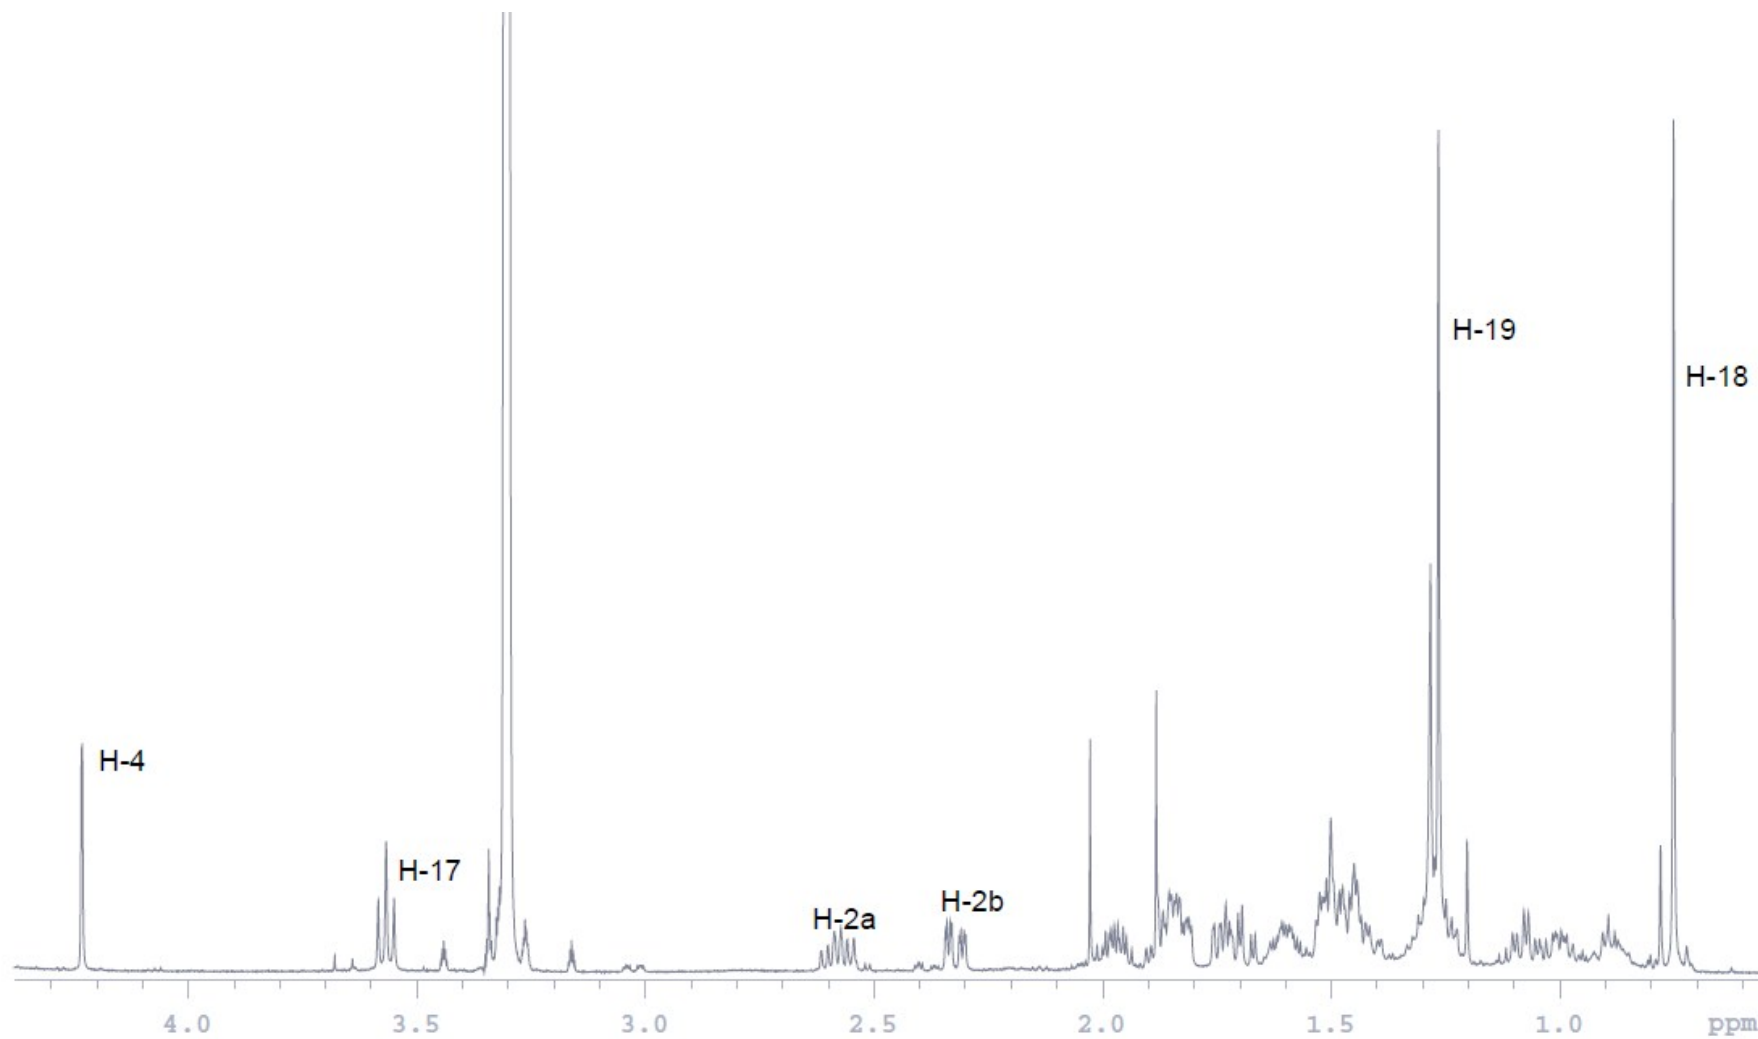

$^1\text{H}$  NMR spectrum of  $4\alpha,5\alpha$ -Dihydroxytestosterone (P1)

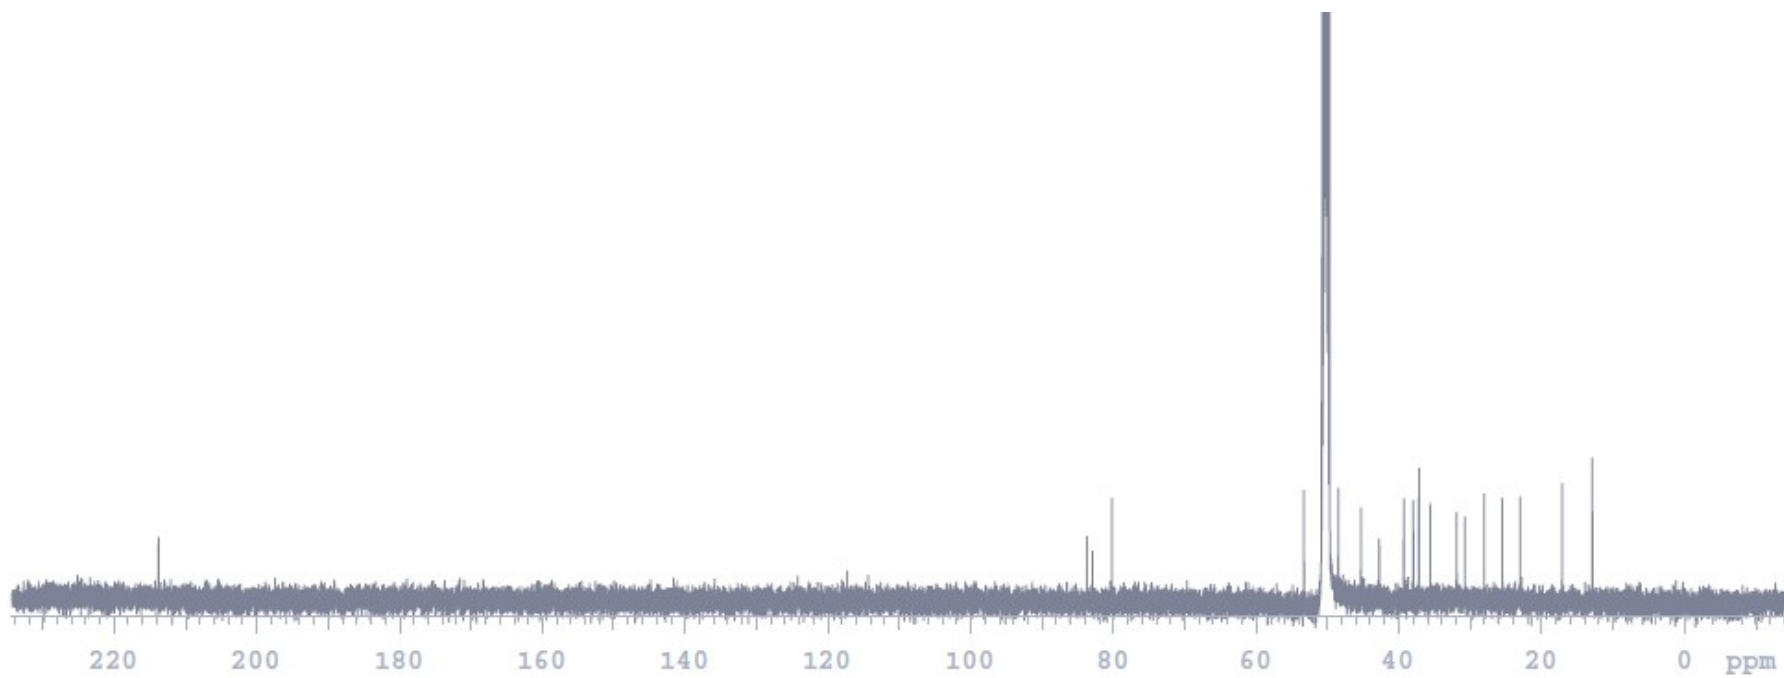

$^{13}\text{C}$  NMR spectrum of 4 $\alpha$ ,5 $\alpha$ -Dihydroxytestosterone (P1)

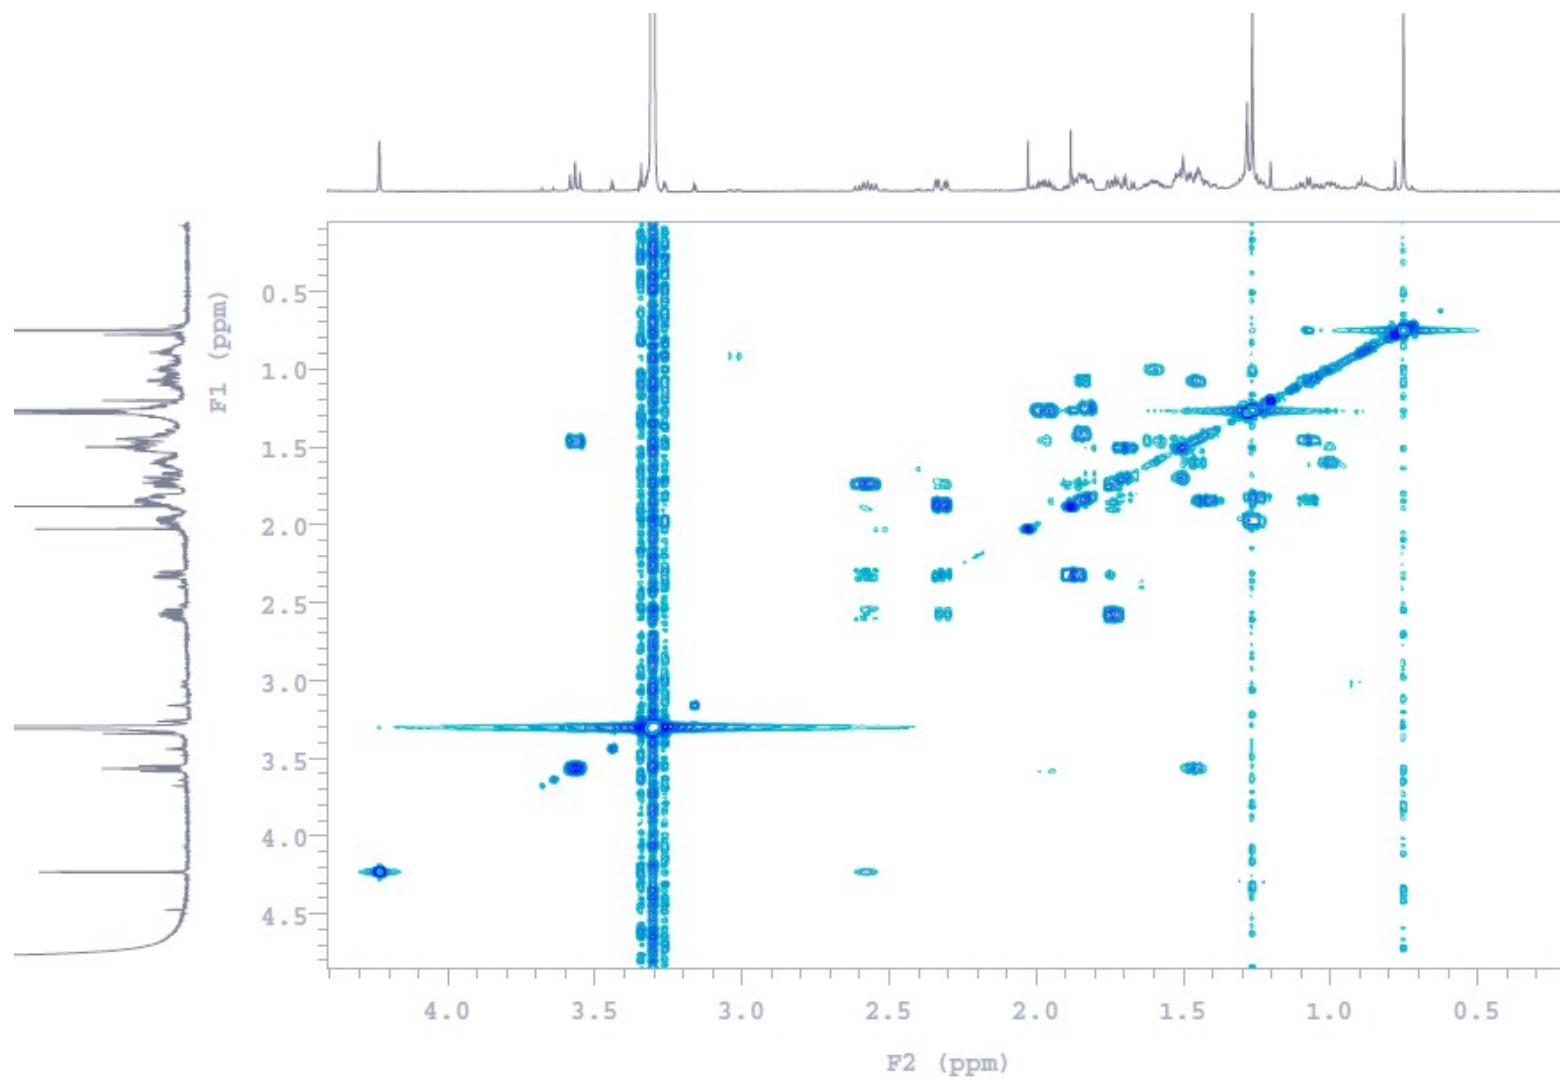

COSY spectrum of 4 $\alpha$ ,5 $\alpha$ -Dihydroxytestosterone (P1)

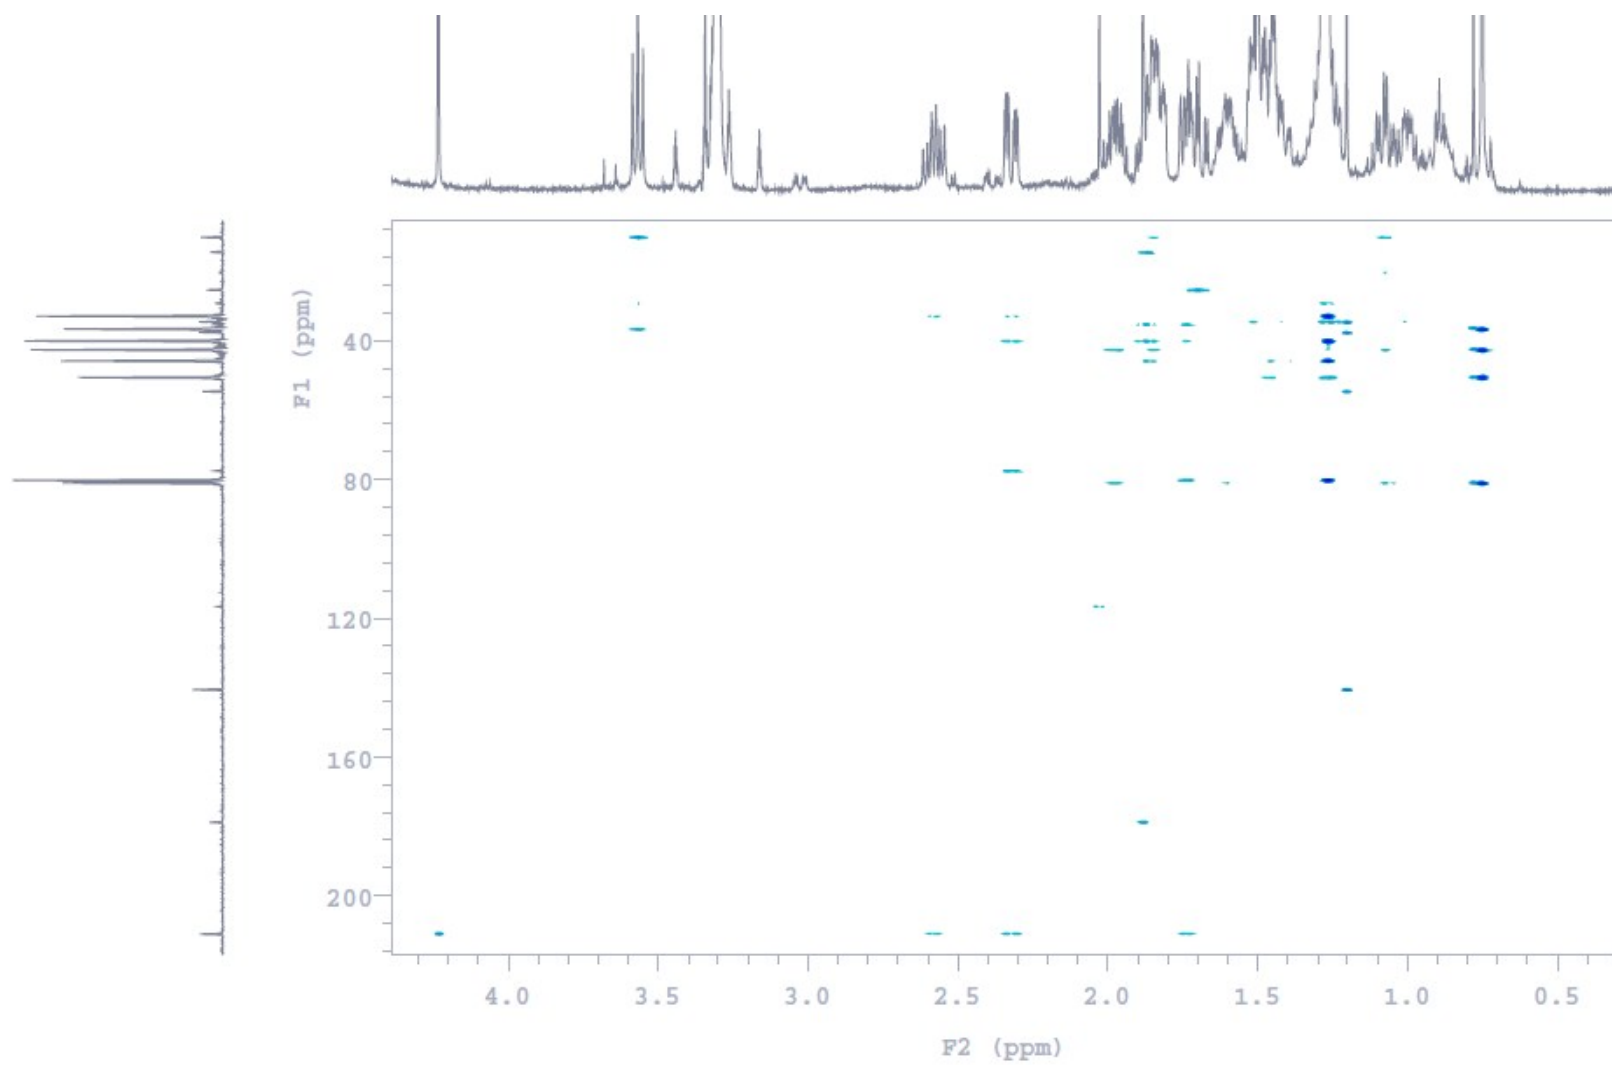

HMBC spectrum of 4 $\alpha$ ,5 $\alpha$ -Dihydroxytestosterone (P1)

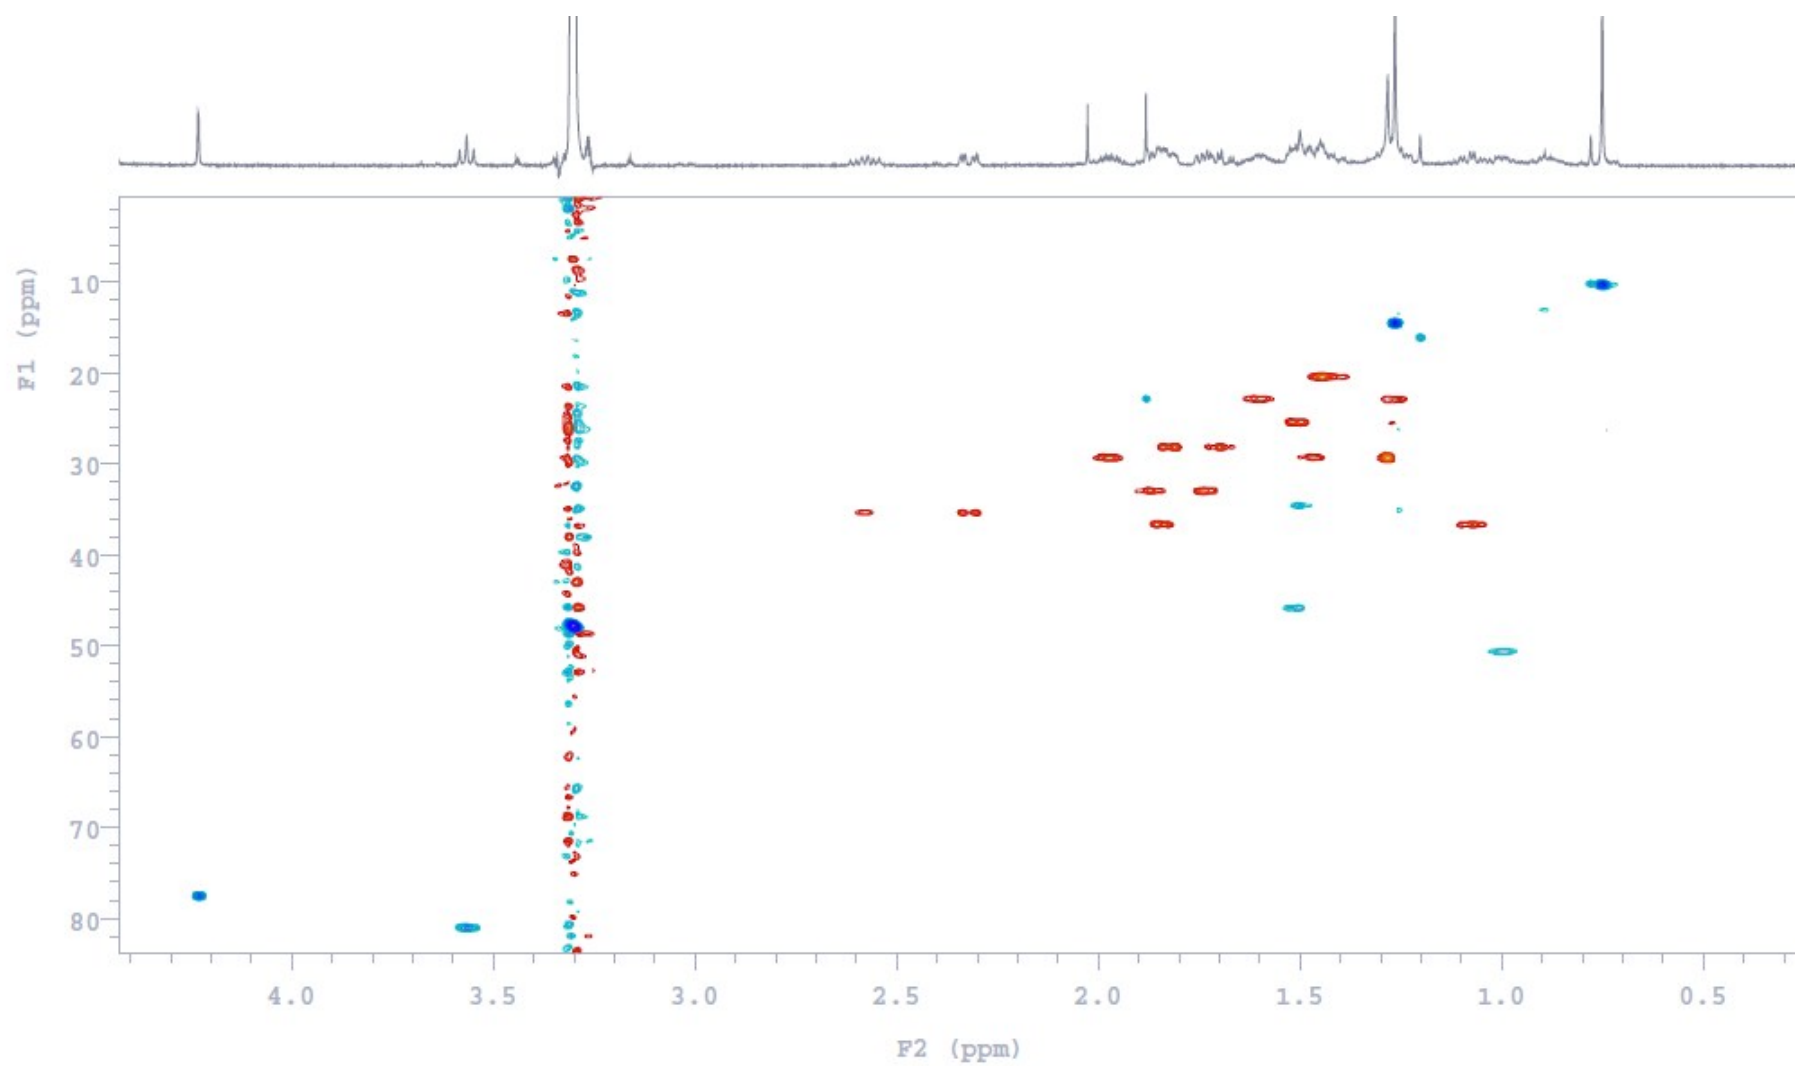

HSQC spectrum of  $4\alpha,5\alpha$ -Dihydroxytestosterone (P1)

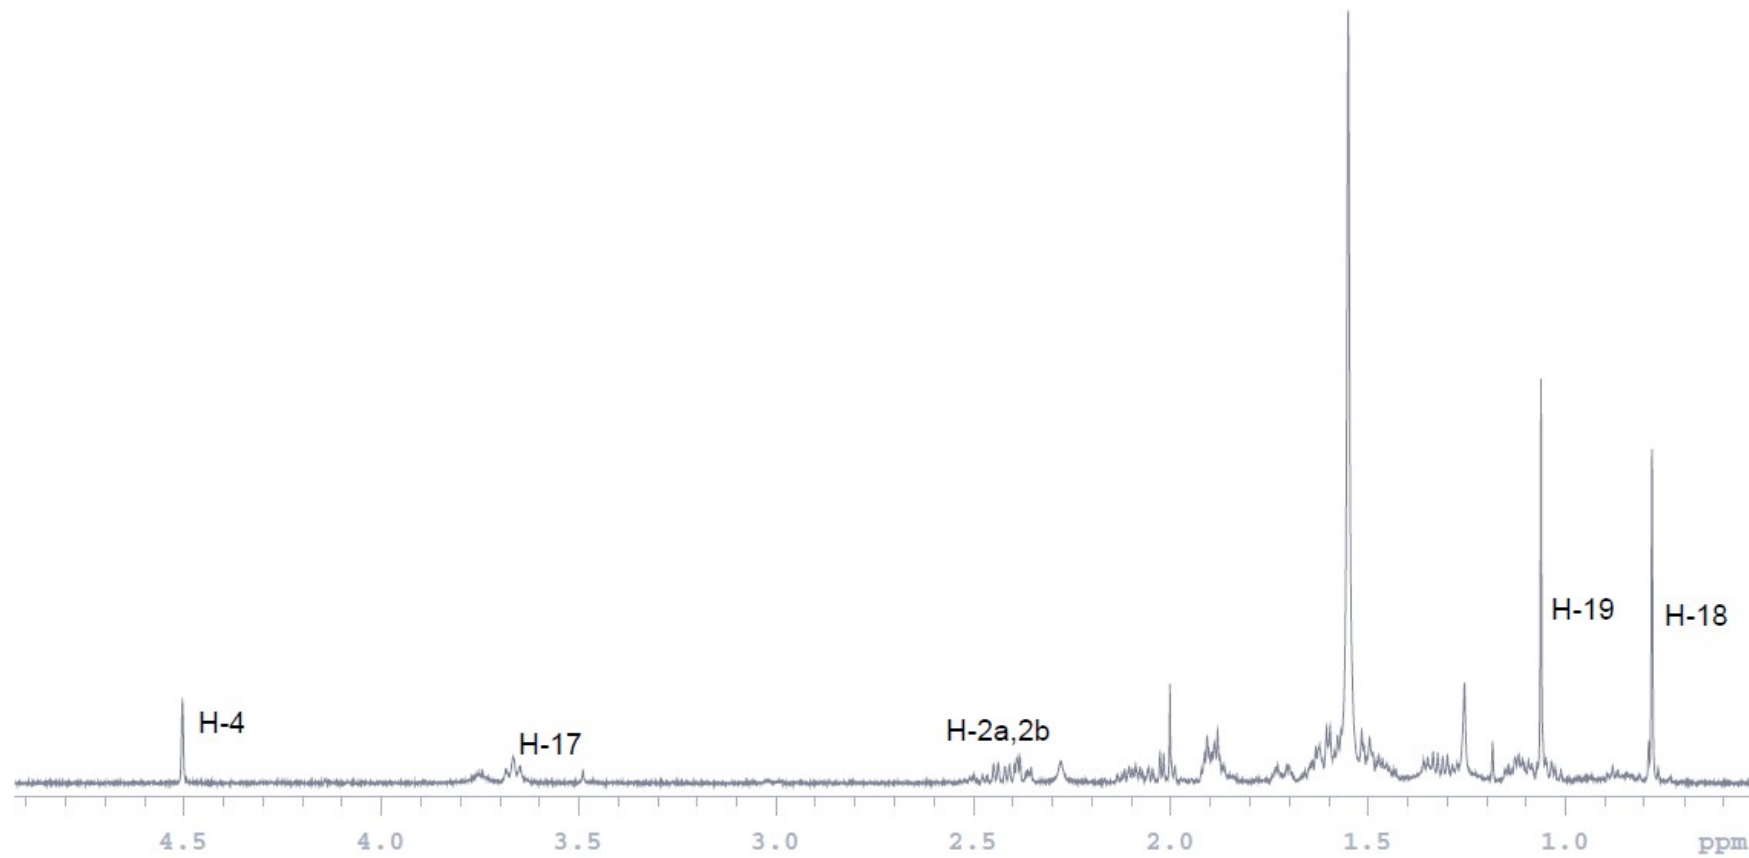

$^1\text{H}$  NMR spectrum of  $4\beta,5\beta$ -Dihydroxytestosterone (P2)

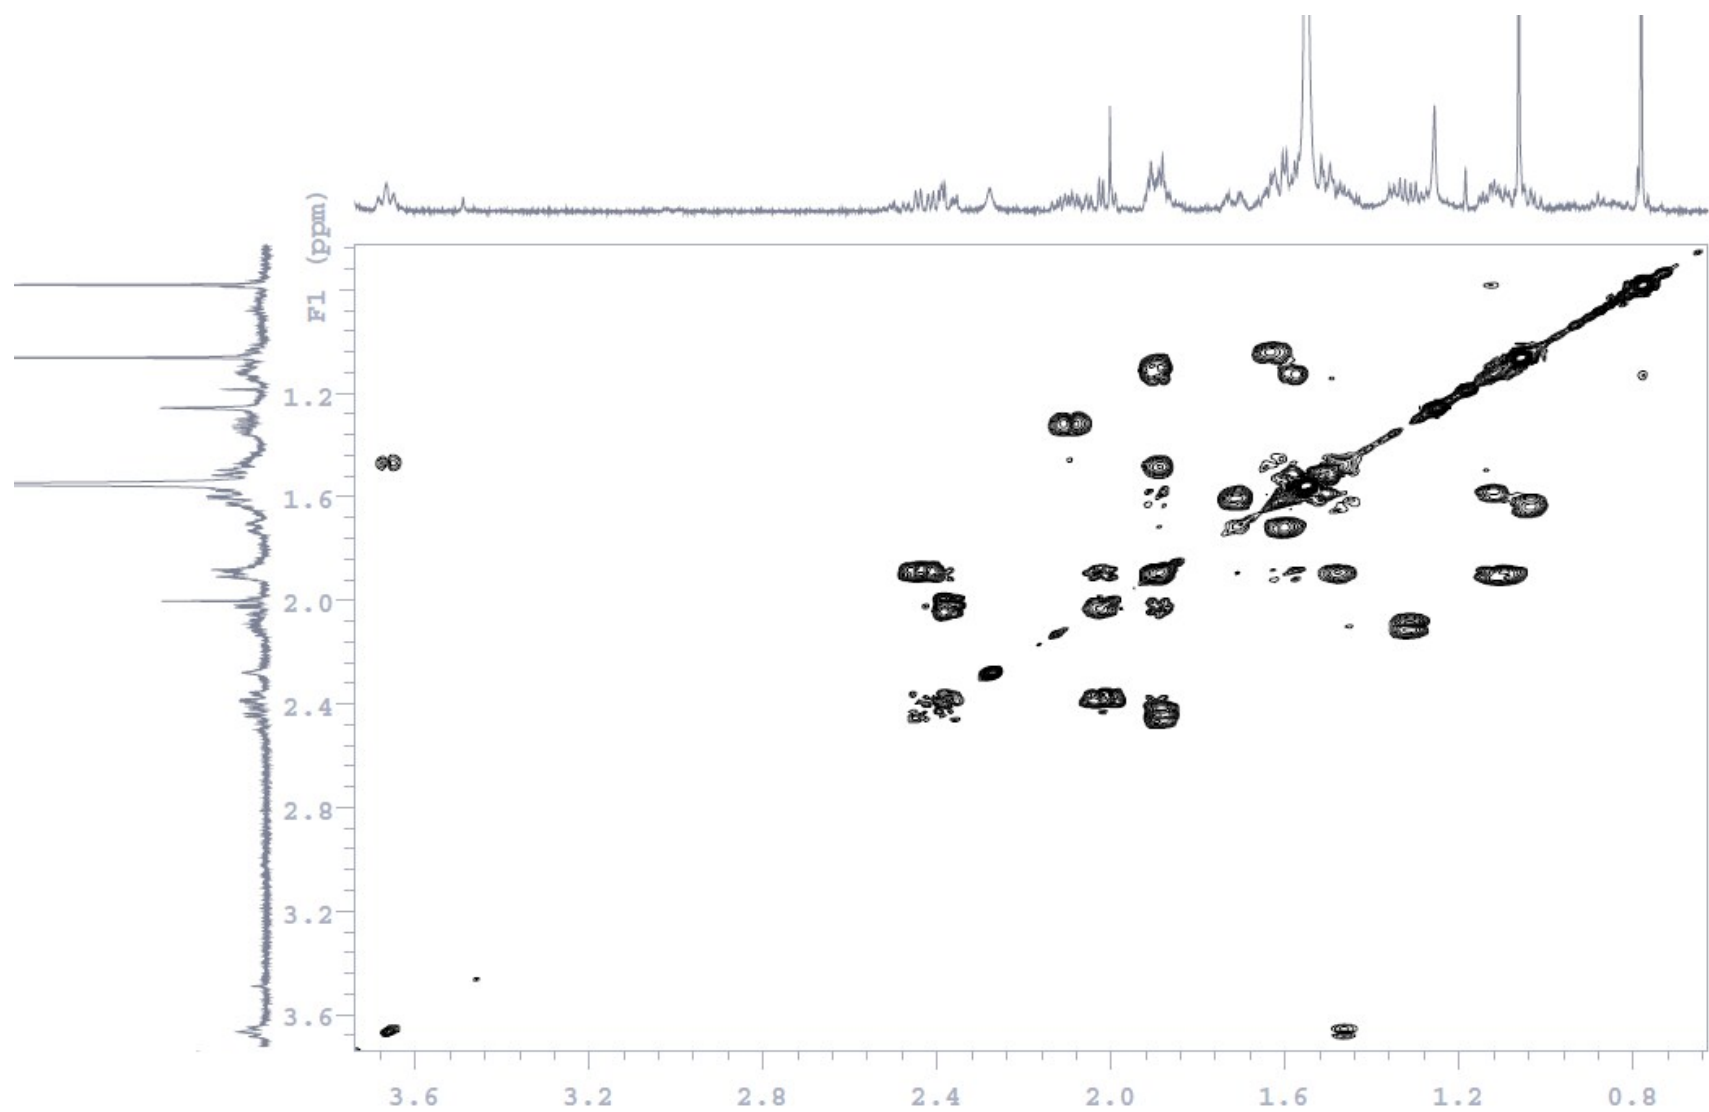

COSY spectrum of 4β,5β-Dihydroxytestosterone (P2)



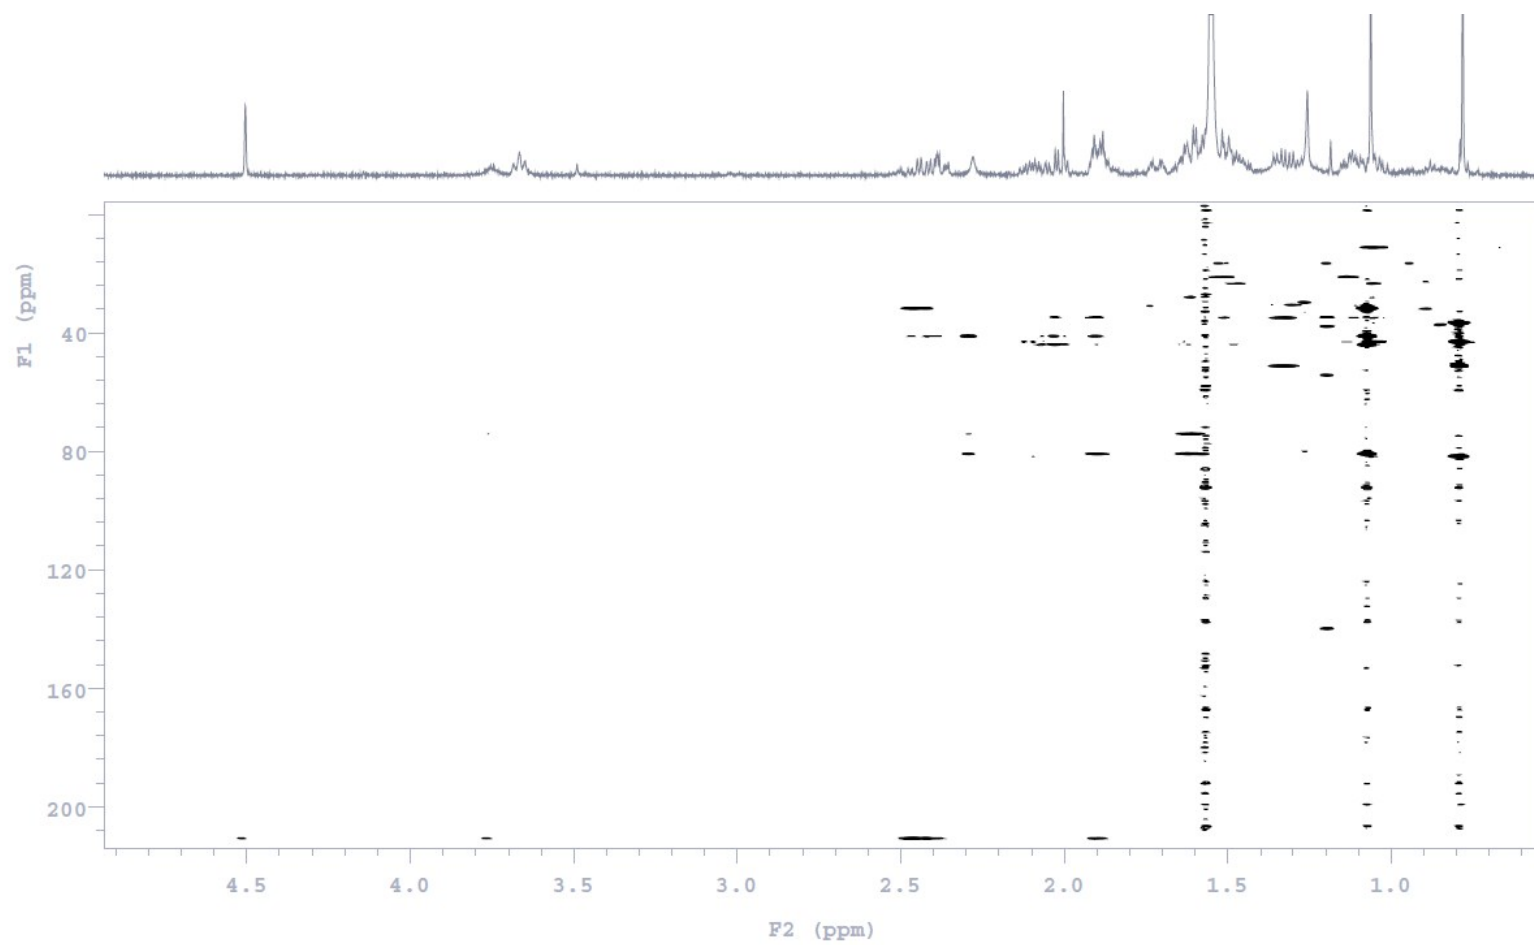

HMBC spectrum of 4β,5β-Dihydroxytestosterone (P2)

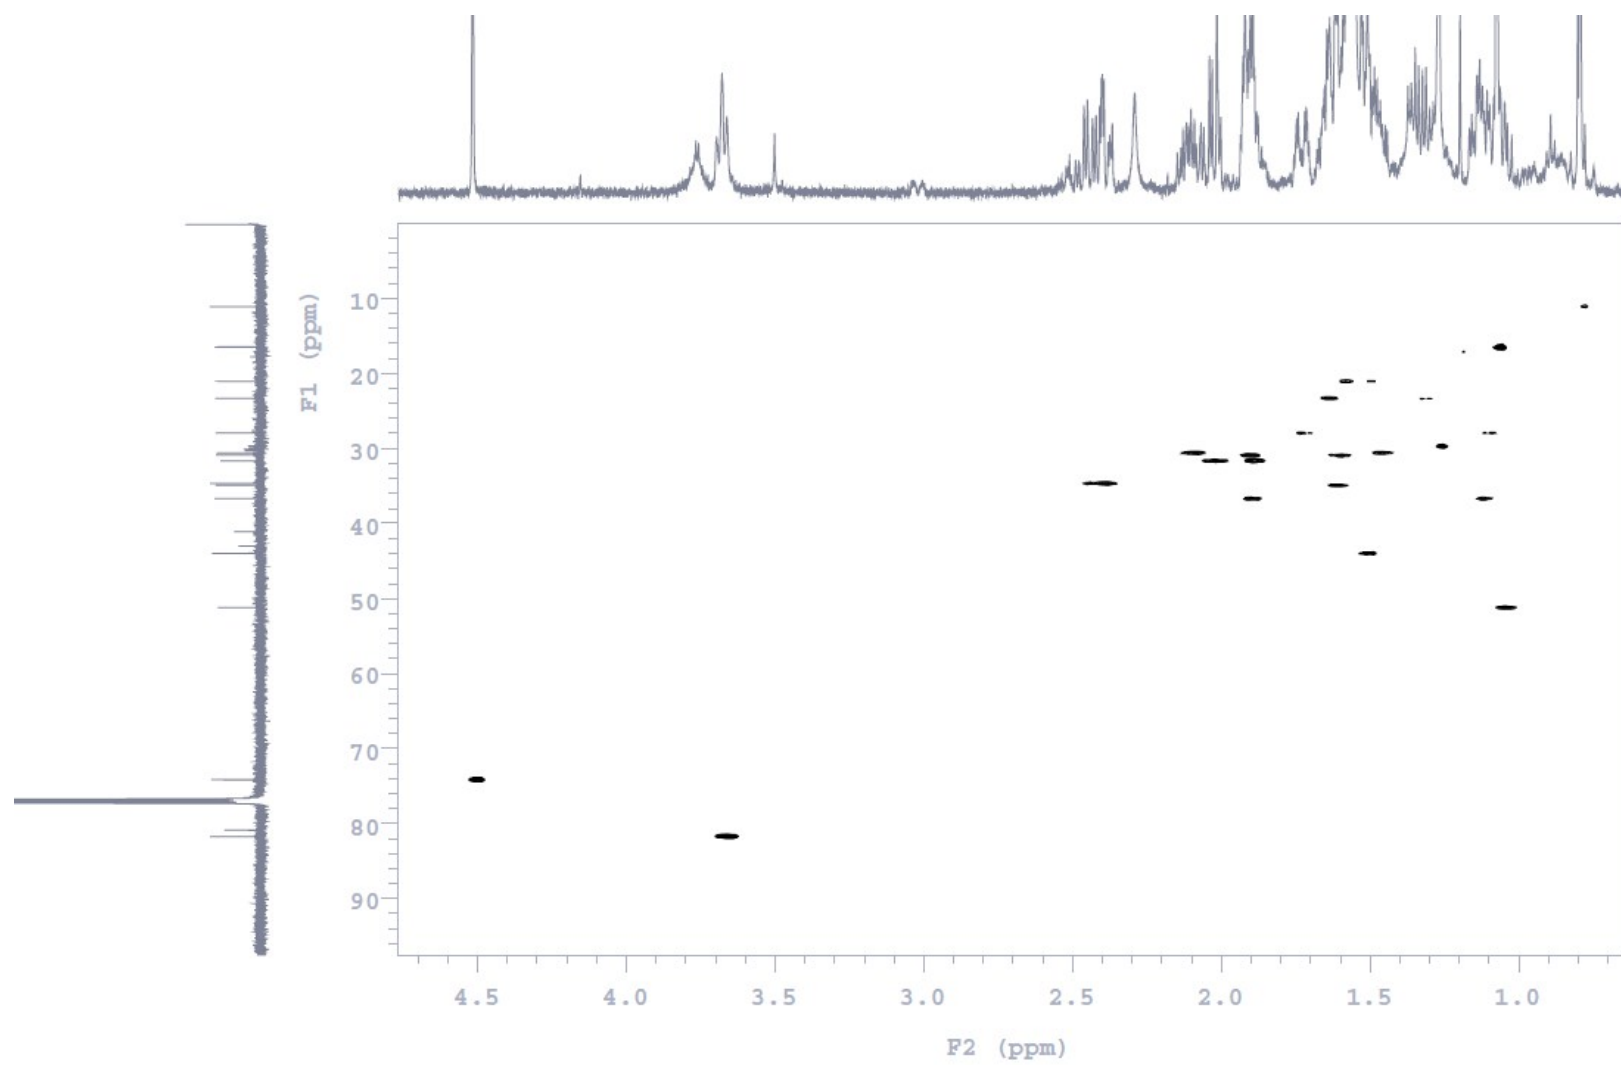

HSQC NMR spectrum of 4β,5β-Dihydroxytestosterone (P2)

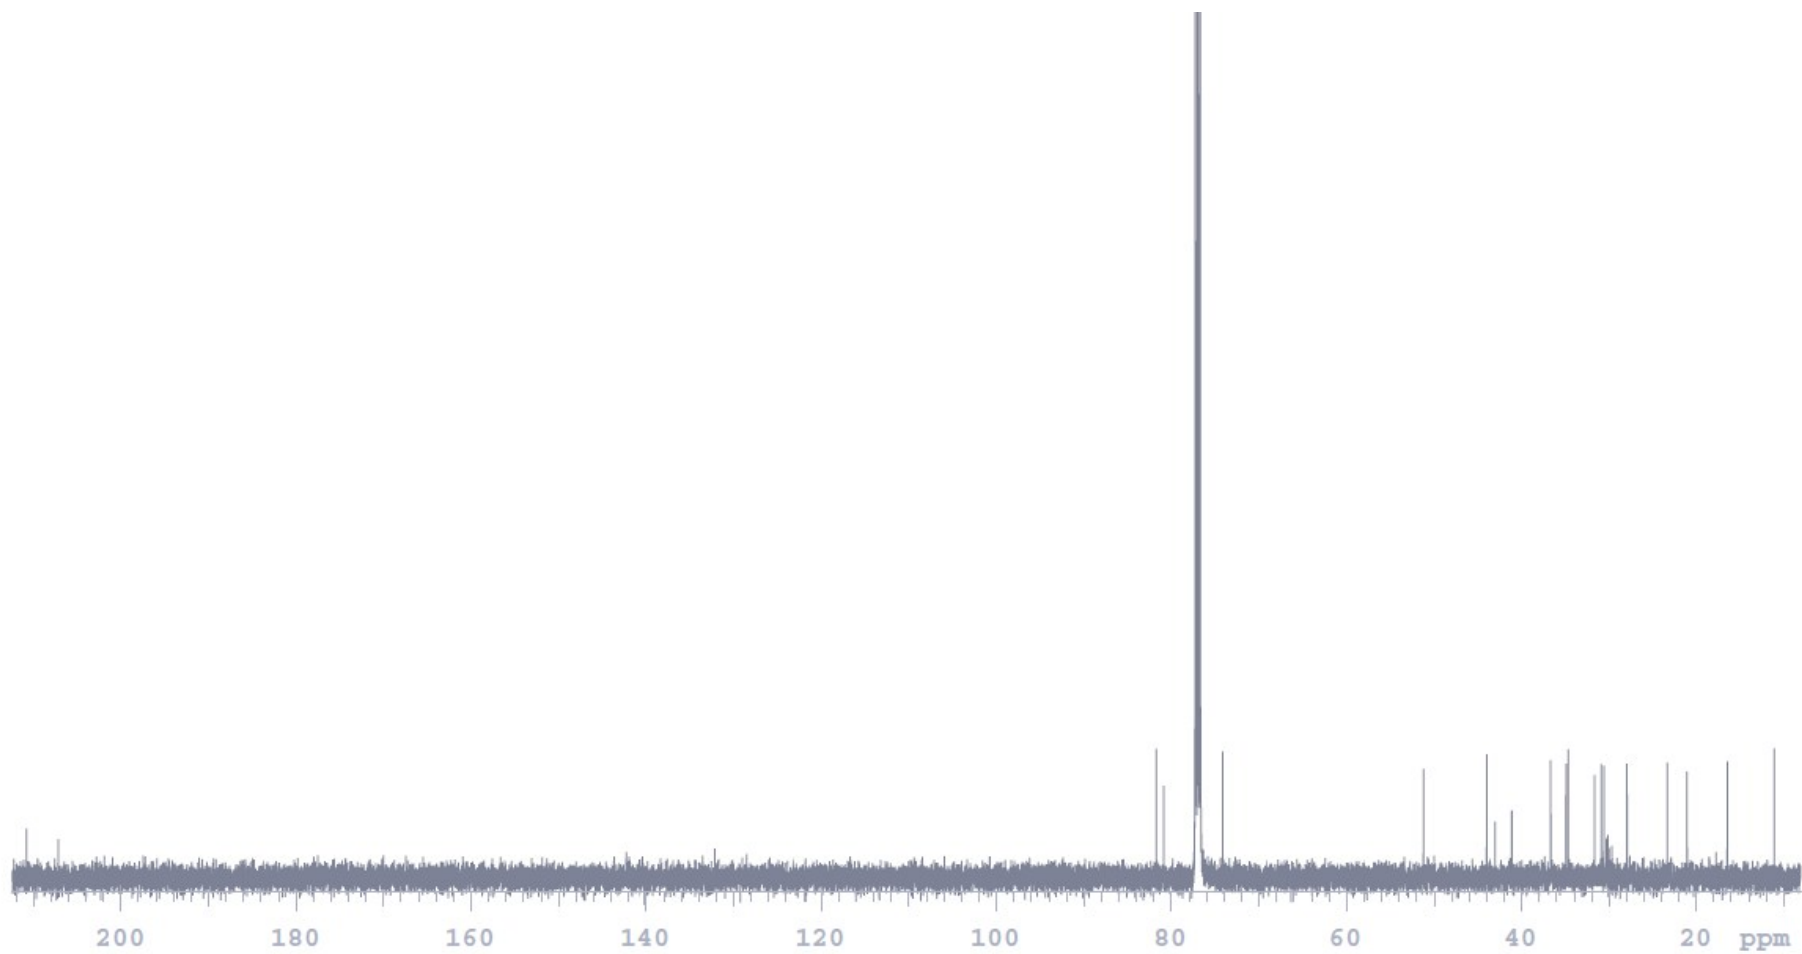

$^{13}\text{C}$  NMR spectrum of  $4\beta,5\beta$ -Dihydroxytestosterone (P2)

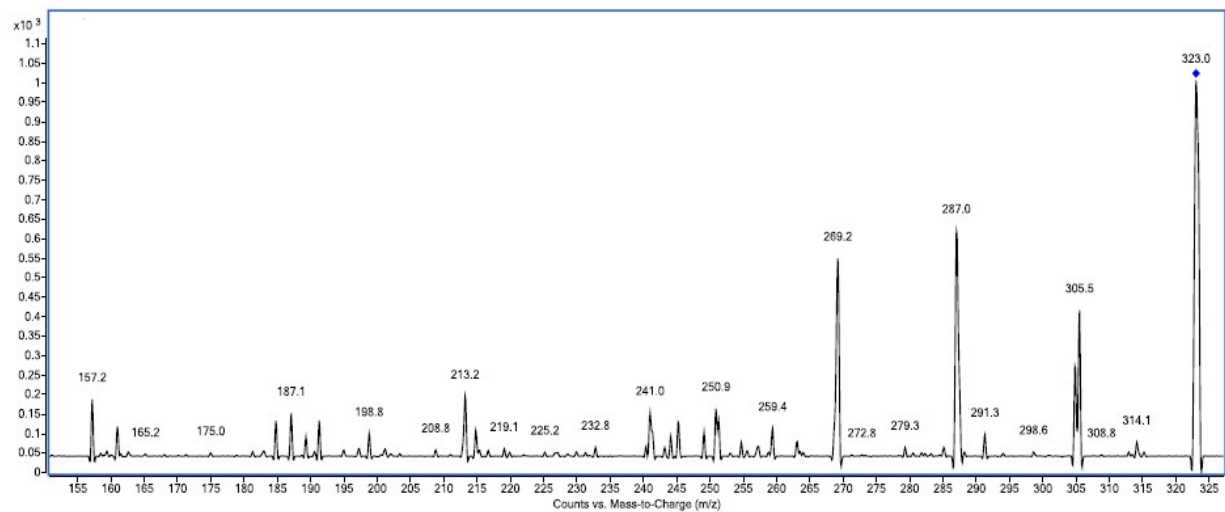

Product ion spectrum of 4 $\alpha$ ,5 $\alpha$ -Dihydroxytestosterone (P1)

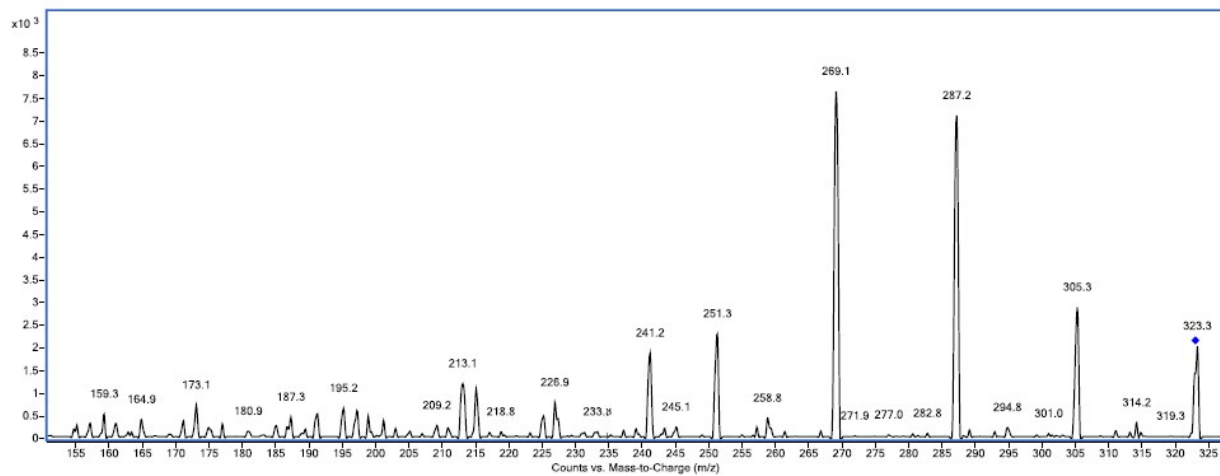

Product ion spectrum of 4 $\beta$ ,5 $\beta$ -Dihydroxytestosterone (P2)
